# Supplementary material for: Highly-selective synthesis of trimetallic PtRuCu nanoframes as robust catalysts for the methanol oxidation reaction
Source: Royal Society of Chemistry journal article supplement (doi:10.1039/d0qm00033g), 2020-01-01
Supplement: d0qm00033g1.pdf [file d0qm00033g1.pdf]

*Electronic Supplementary Information*

**Highly-selective Synthesis of Trimetallic PtRuCu Nanoframes as Robust Catalysts for Methanol Oxidation Reaction**

Hai-Jing Yin,<sup>a</sup> Zhi-Ping Zhang,<sup>a</sup> Yu Guo,<sup>a</sup> Kun Yuan<sup>a</sup> and Ya-Wen Zhang<sup>a,\*</sup>

<sup>a</sup> *Beijing National Laboratory for Molecular Sciences, State Key Laboratory of Rare Earth Materials Chemistry and Applications, PKU-HKU Joint Laboratory in Rare Earth Materials and Bioinorganic Chemistry, College of Chemistry and Molecular Engineering, Peking University, Beijing 100871, China. Fax: +86-10-62756787; Tel: +86-10-62756787.*

*\*Corresponding author: ywzhang@pku.edu.cn*

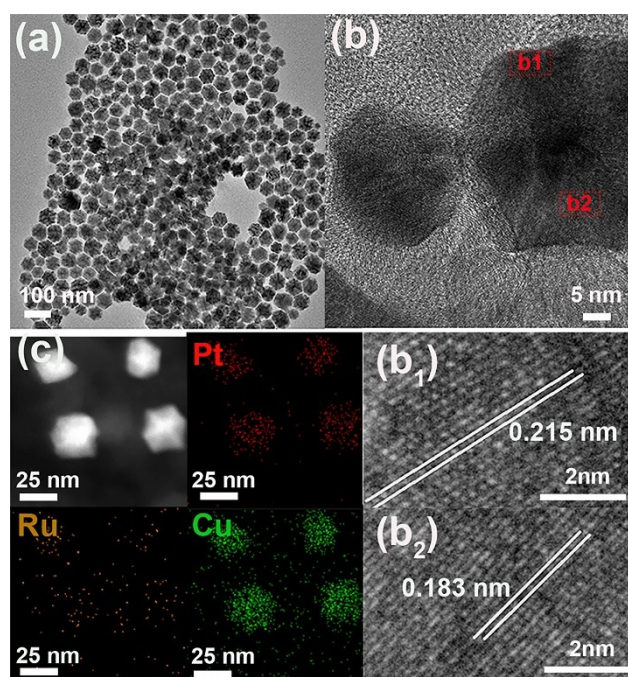

**Fig. S1.** (a) TEM, (b) HRTEM, (c) HAADF-STEM images and EDS 2D element mappings of PtRuCu NPs.

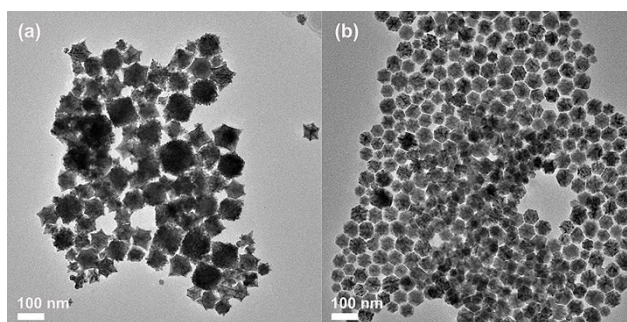

**Fig. S2.** TEM image of PtRuCu NPs with different pre-mixing time in 200 °C: (a) 0 min, (b) 20 min.

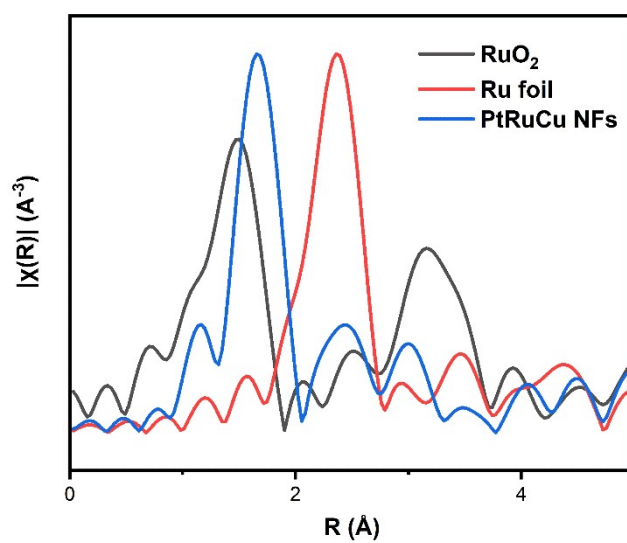

**Fig. S3.** EXAFS spectra of the Ru K edge.

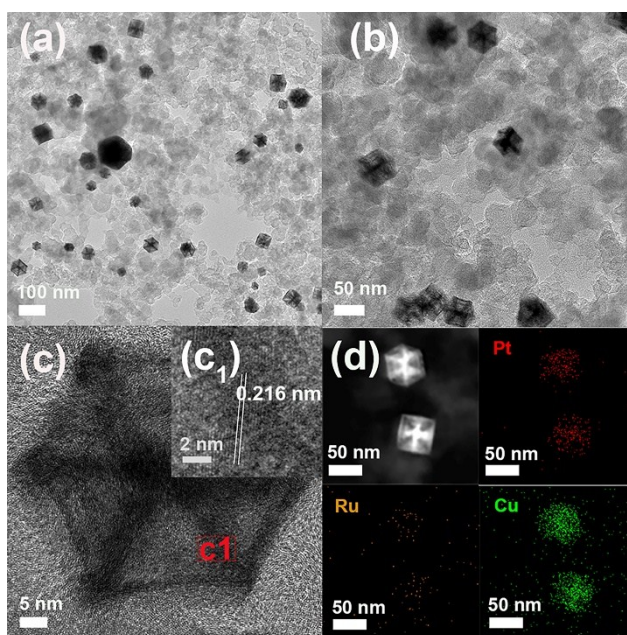

**Fig. S4.** (a) and (b) TEM, (c) HRTEM, (d) HAADF-STEM images and EDS 2D element mappings of PtRuCu NFs-HAc.

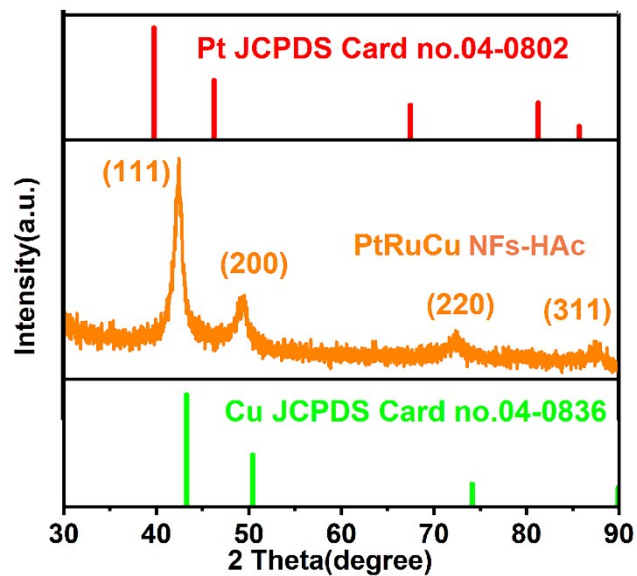

**Fig. S5.** XRD pattern of PtRuCu NFs-HAc.

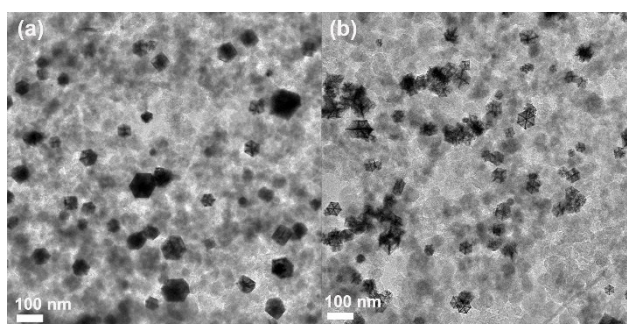

**Fig. S6.** TEM images of (a) PtRuCu NFs-HAc and (b) PtRuCu NFs.

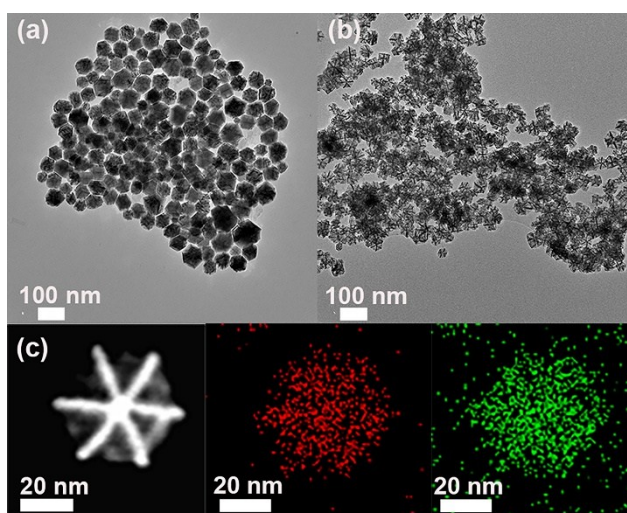

**Fig. S7.** (a) TEM image of PtCu NPs. (b) TEM image of PtCu NFs. (c) HAADF-STEM image and EDS 2D element mappings of PtCu NFs.



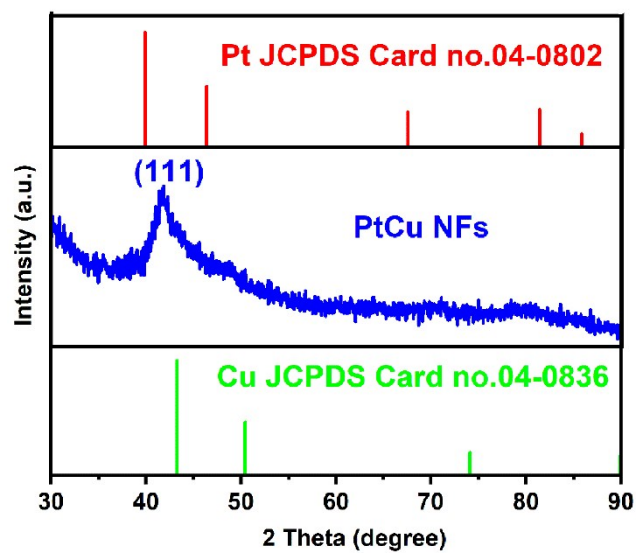

**Fig. S8.** XRD pattern of PtCu NFs.

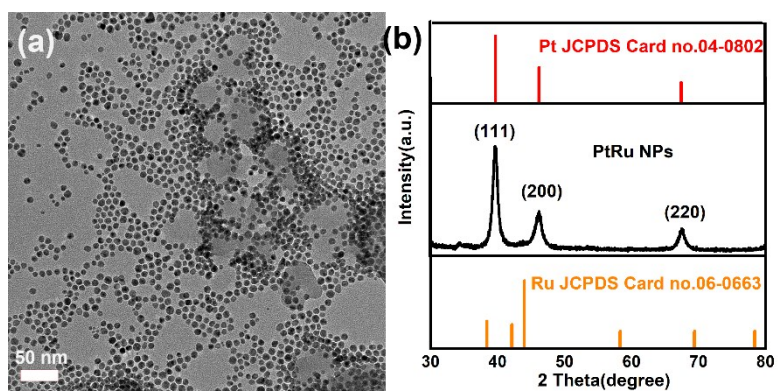

**Fig. S9.** (a) TEM image and (b) XRD pattern of PtRu NPs.

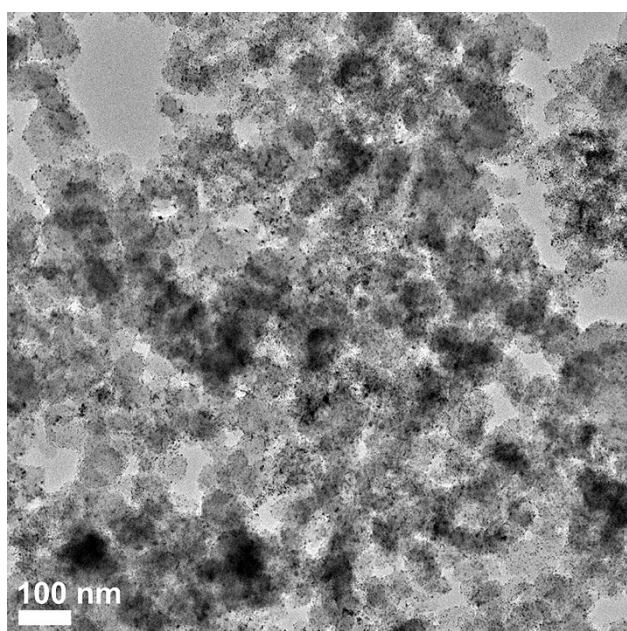

**Fig. S10.** TEM image of commercial Pt/C.

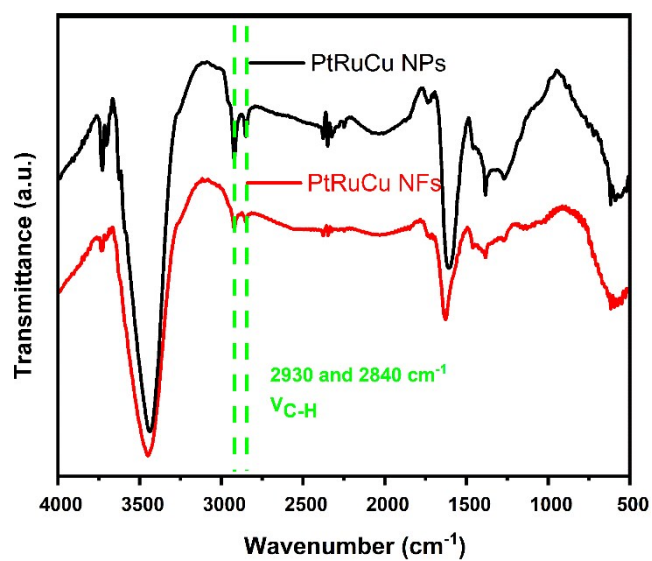

**Fig. S11.** FTIR spectra of PtRuCu NFs and PtRuCu NPs.

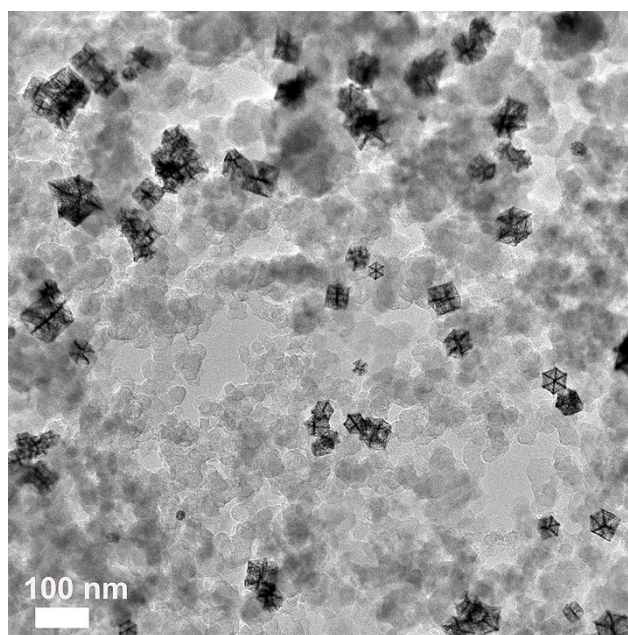

**Fig. S12.** TEM image of PtRuCu NFs-OAm/C.

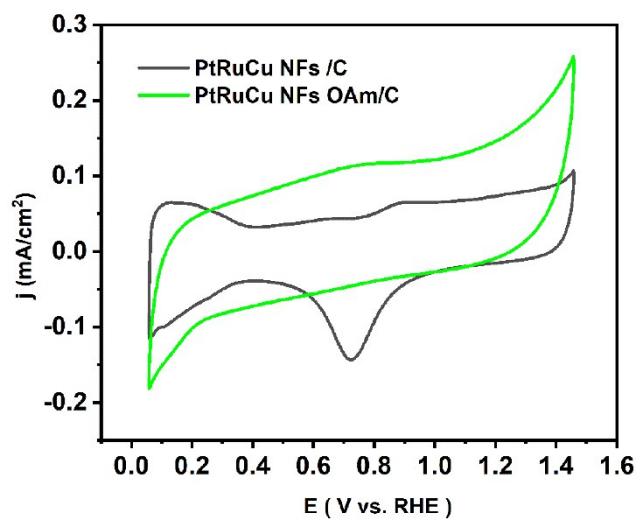

**Fig. S13.** CV curves in 0.1 M HClO<sub>4</sub> for PtRuCu NFs/C and PtRuCu NFs-OAm/C.

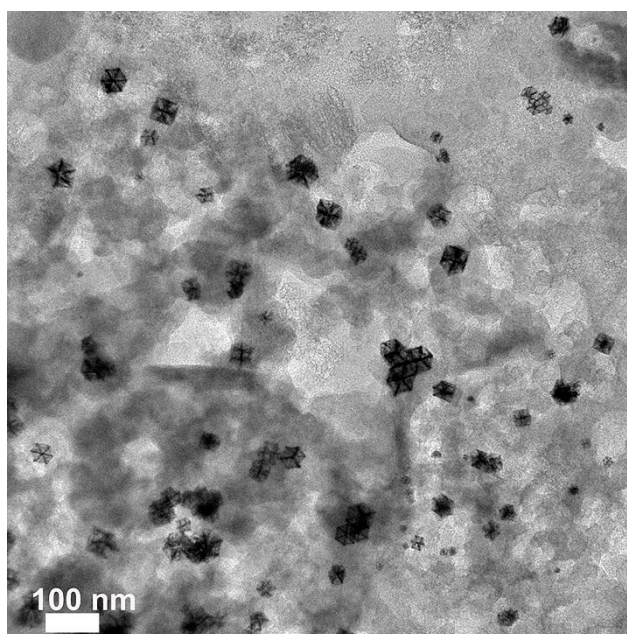

**Fig. S14.** TEM image of PtRuCu NPs after MOR test.

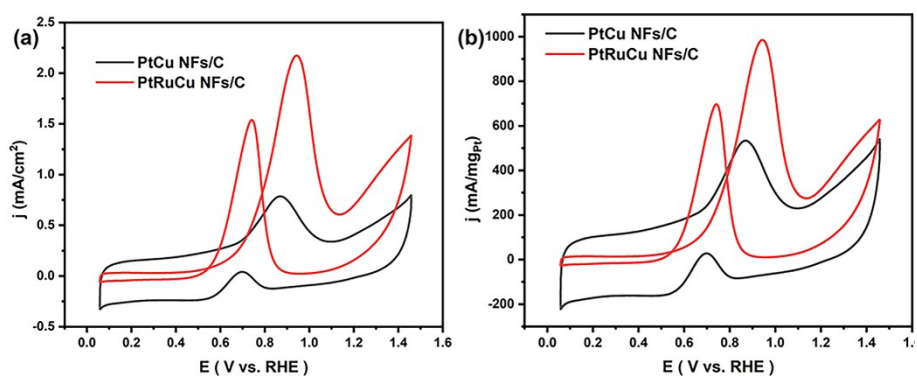

**Fig. S15.** Electrocatalytic activity of PtRuCu NFs/C and PtCu NFs/C. (a) specific activity and (b) mass activity in 0.1 M HClO<sub>4</sub> and 1 M CH<sub>3</sub>OH solution.



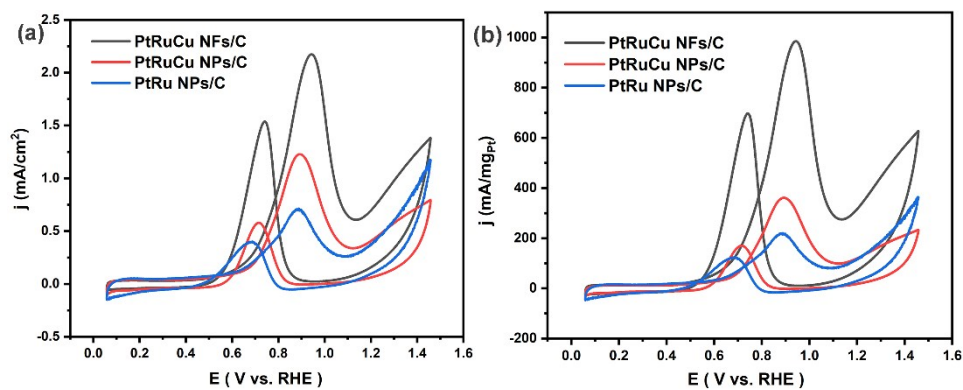

**Fig. S16.** Electrocatalytic activity of PtRuCu NFs/C, PtRuCu NPs/C and PtRu NPs/C. (a) specific activity and (b) mass activity in 0.1 M HClO<sub>4</sub> and 1 M CH<sub>3</sub>OH solution

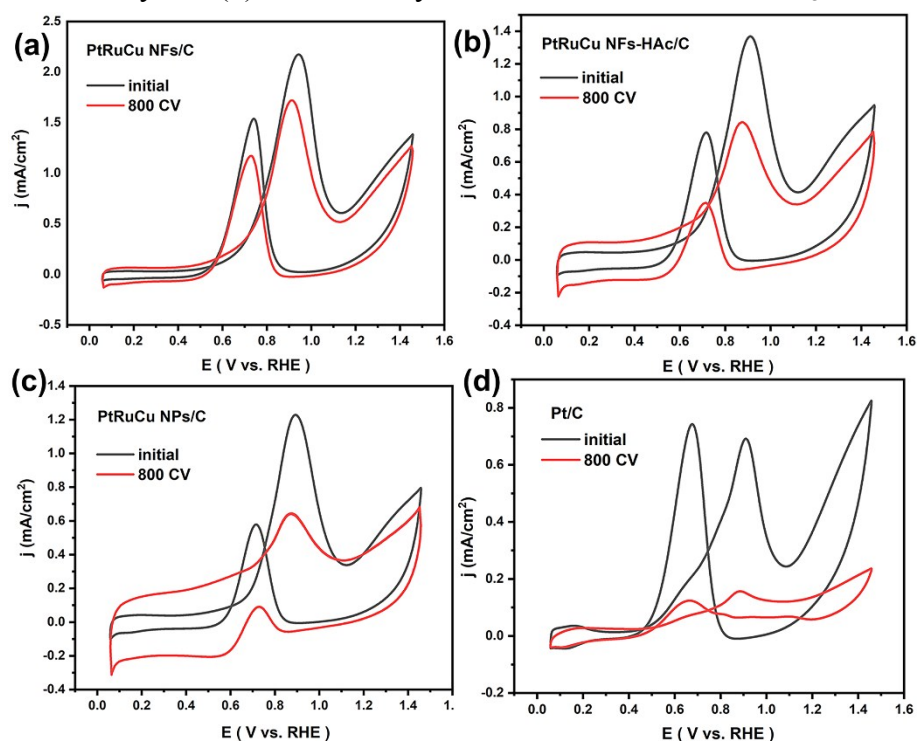

**Fig. S17.** MOR performance of (a) PtRuCu NFs/C, (b) PtRuCu NFs-HAc/C, (c) PtRuCu NPs/C and (d) Pt/C after 0 and 800 CV cycles.

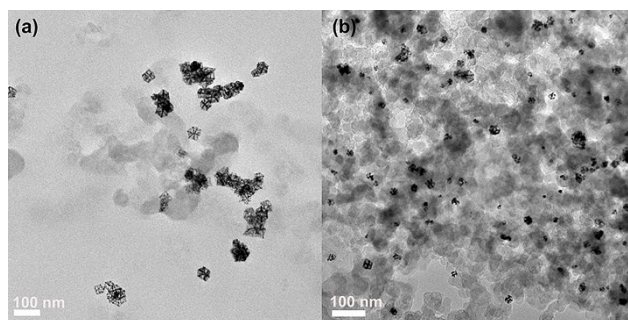

**Fig. S18.** TEM images of (a) PtRuCu NFs/C and (b) PtRuCu NFs-HAc/C after 800

CV cycles.

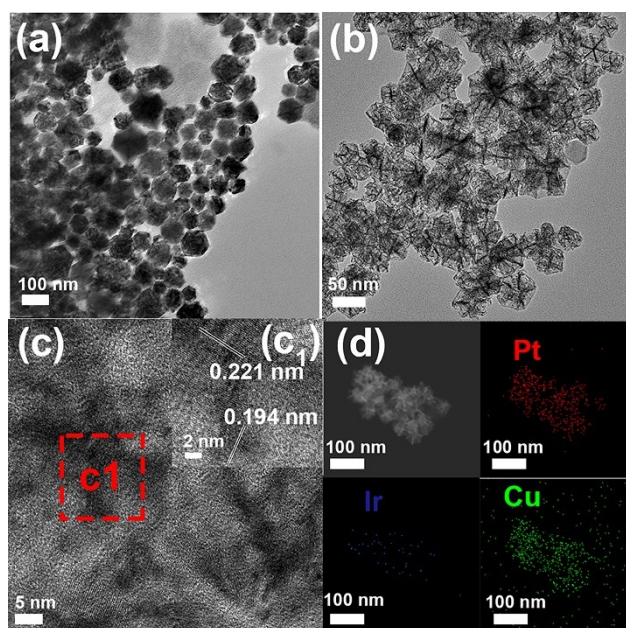

**Fig. S19.** (a) TEM image of PtIrCu NPs. (b)TEM, (c) HRTEM, (d) HAADF-STEM images and EDS 2D element mappings of PtIrCu NFs.

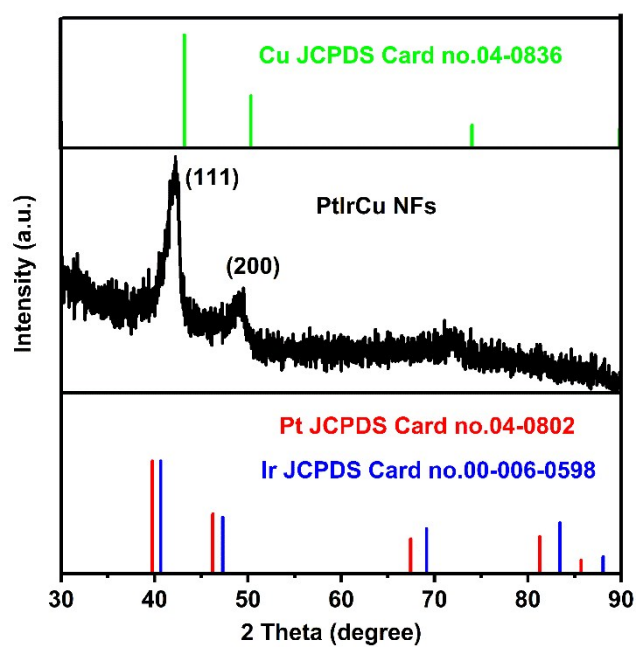

**Fig. S20.** XRD pattern of PtIrCu NFs.



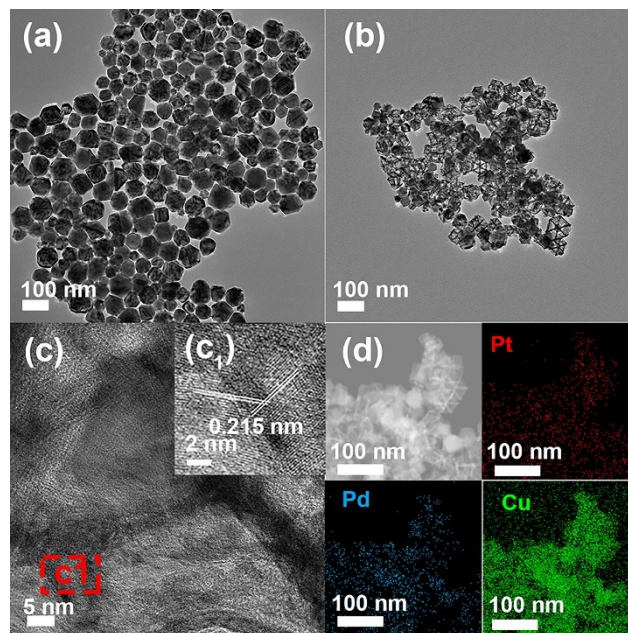

**Fig. S21.** (a) TEM image of PtPdCu NPs. (b)TEM, (c) HRTEM, (d) HAADF-STEM images and EDS 2D element mappings of PtPdCu NFs.

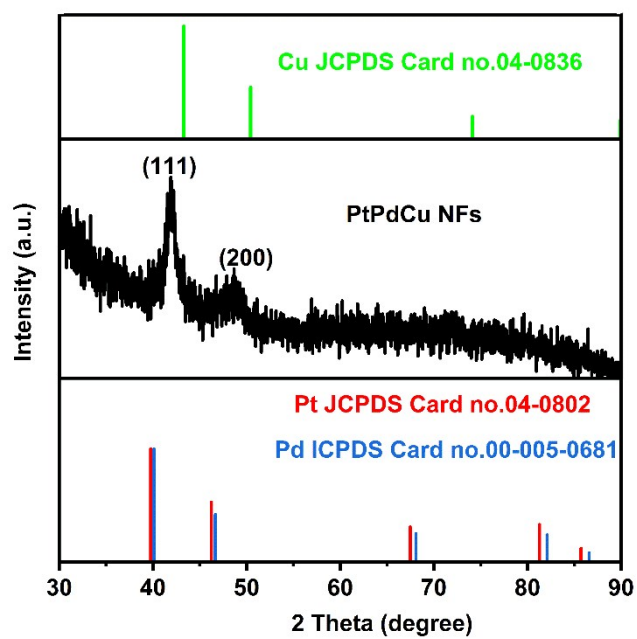

**Fig. S22.** XRD pattern of PtIrCu NFs.
